# Supplementary material for: Yellow electrochromic polymer materials with fine tuning electrofluorescences by adjusting steric hindrance of side chains
Source: Royal Society of Chemistry journal article supplement (doi:10.1039/c7ra03097e), 2017-01-01
Supplement: c7ra03097e1.pdf [file c7ra03097e1.pdf]

## Support Information

### **Yellow Electrochromic Polymer Materials with Fine Tuning Electrofluoresences by Adjusting Steric Hindrance of Side Chains**

Jian Liu, Yuchen Shi, Jingchuan Wu, Mei Li, Jianming Zheng and Chunye Xu\*

\*Corresponding Author:

\*E-mail: [chunye@ustc.edu.cn](mailto:chunye@ustc.edu.cn)

Tel & Fax: +86-551-6360-3459

Website: <http://www.hfnl.ustc.edu.cn/2010/0819/954.html>

Address: Hefei National Laboratory for Physical Sciences at the Microscale, CAS  
Key Laboratory of Soft Matter Chemistry, Department of Polymer Science and  
Engineering, University of Science and Technology of China, Hefei 230026, P.R.  
China

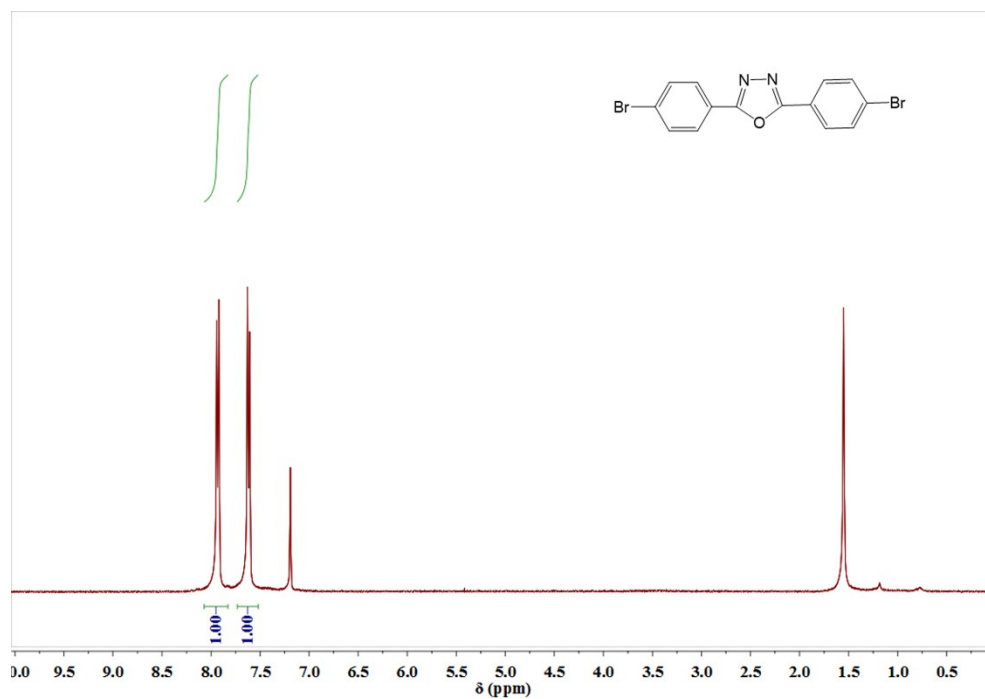

Figure S1. <sup>1</sup>H spectrum of 2,5-bis(4-bromophenyl)-1,3,4-oxadiazole.

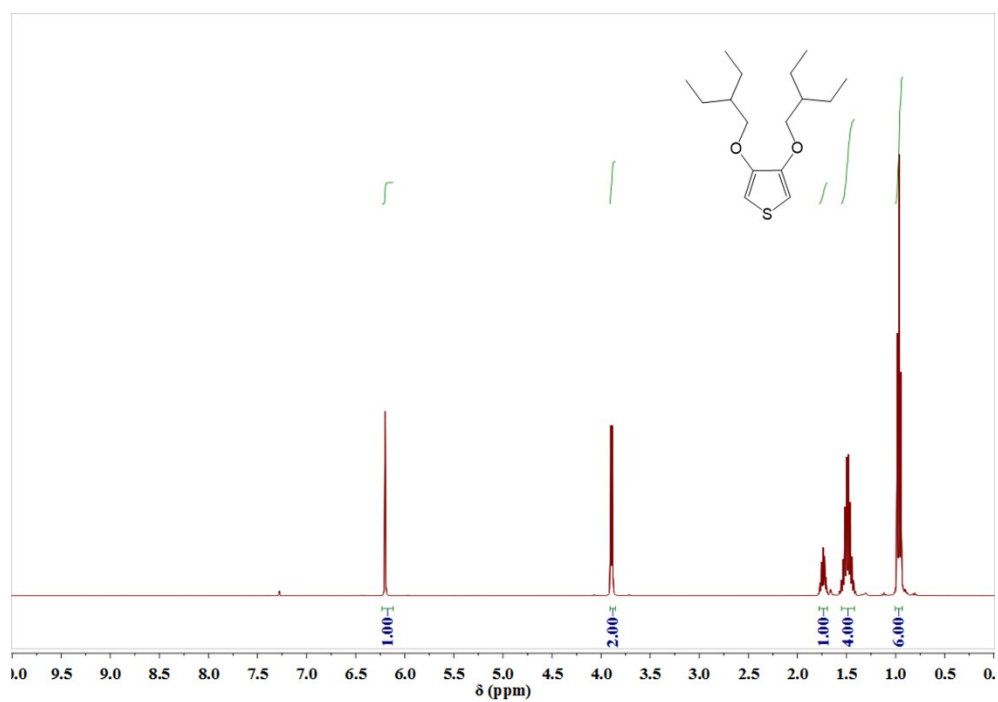

Figure S2. <sup>1</sup>H spectrum of 1'.

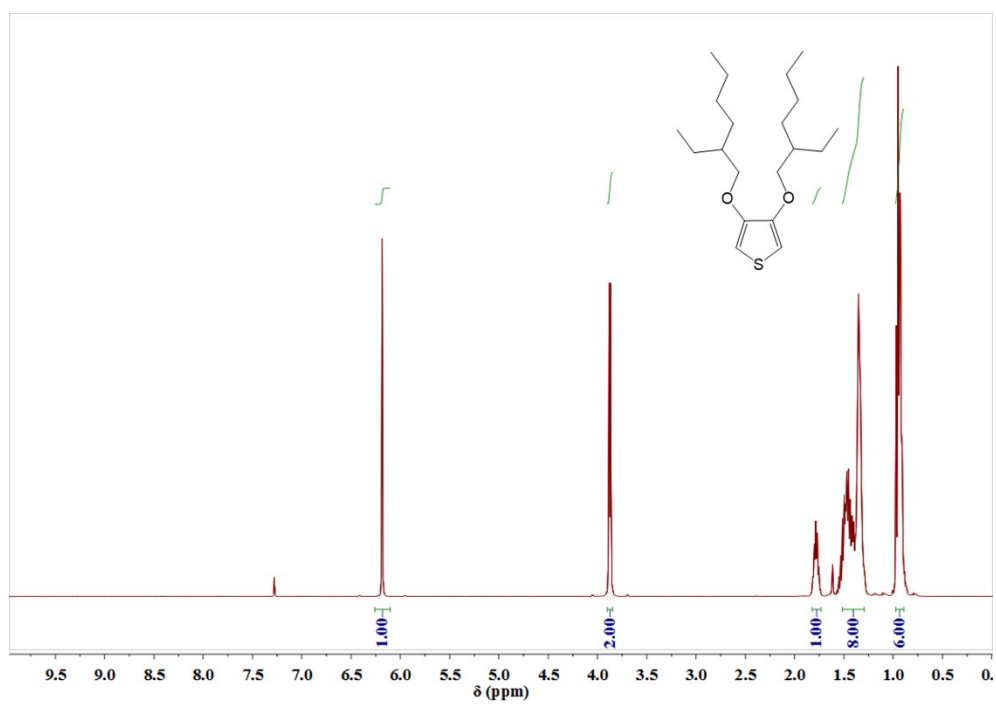

Figure S3. <sup>1</sup>H spectrum of 2'.

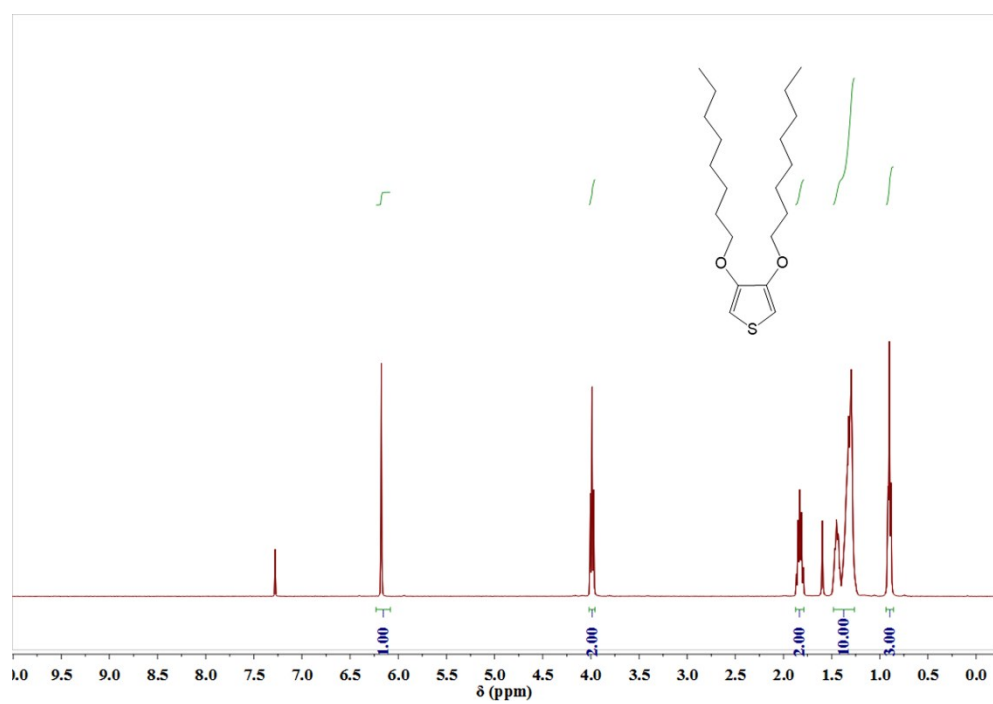

Figure S4. <sup>1</sup>H spectrum of 3'.

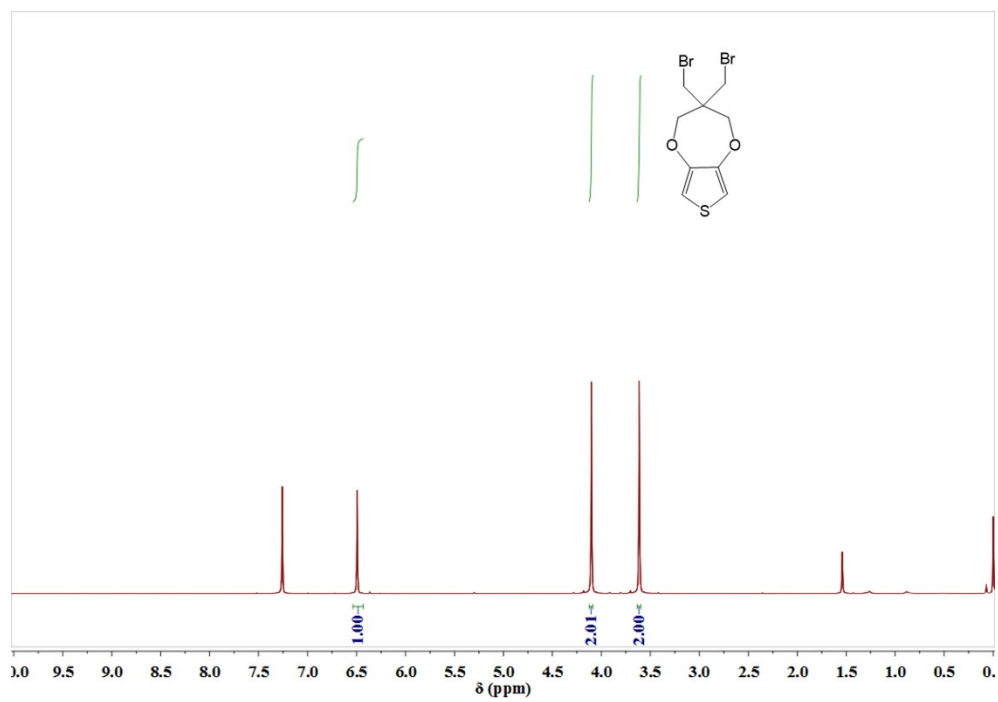

Figure S5.  $^1\text{H}$  spectrum of ProDOT- $(\text{CH}_2\text{Br})_2$ .

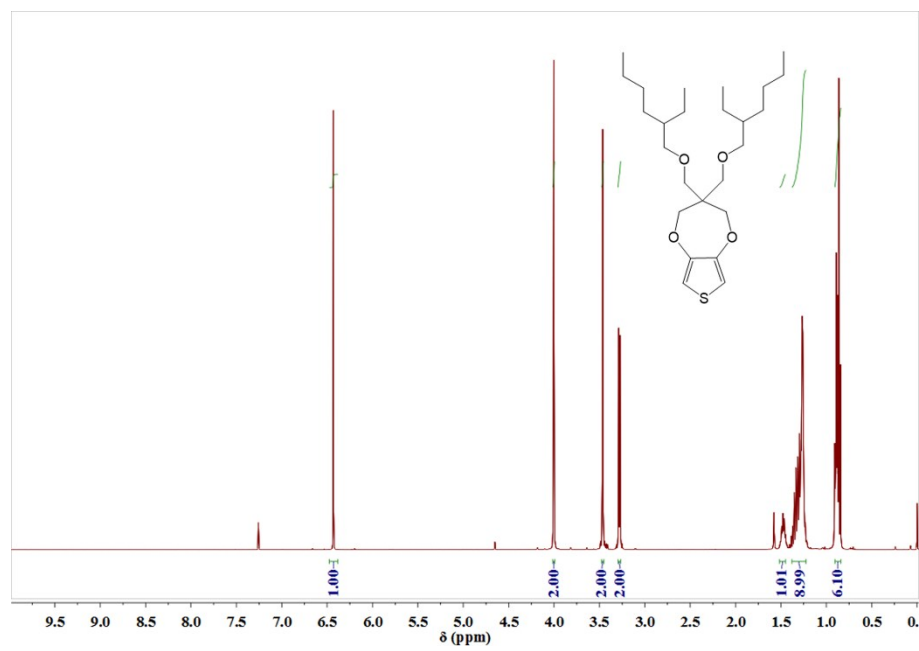

Figure S6.  $^1\text{H}$  spectrum of 4'.

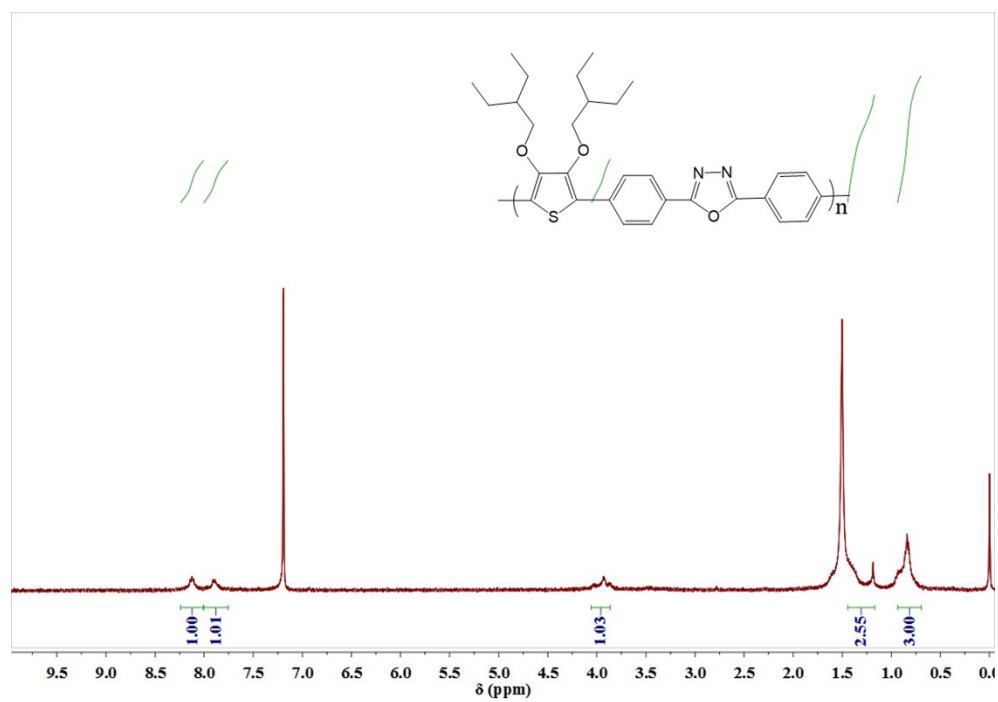

Figure S7.  $^1\text{H}$  spectrum of P1.

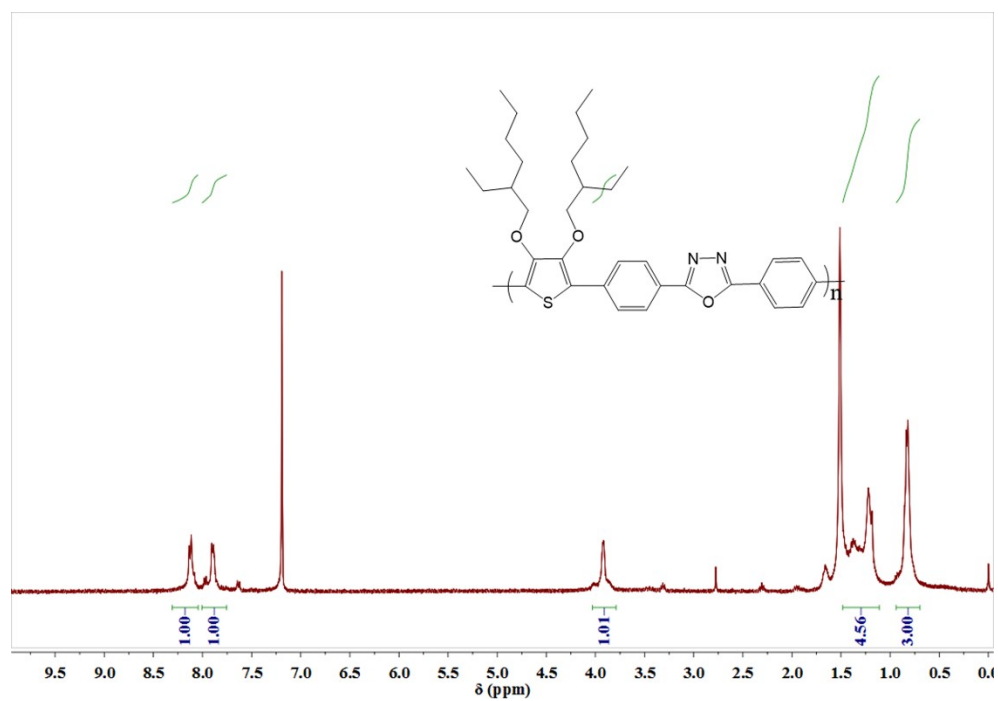

Figure S8.  $^1\text{H}$  spectrum of P2.

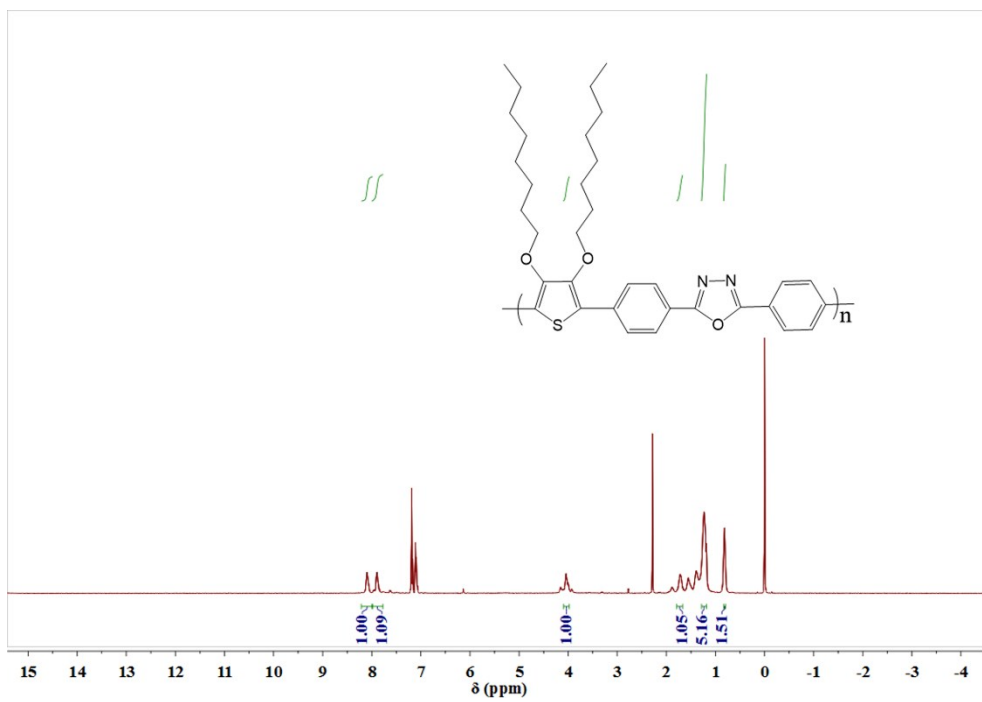

Figure S9.  $^1\text{H}$  spectrum of P3.

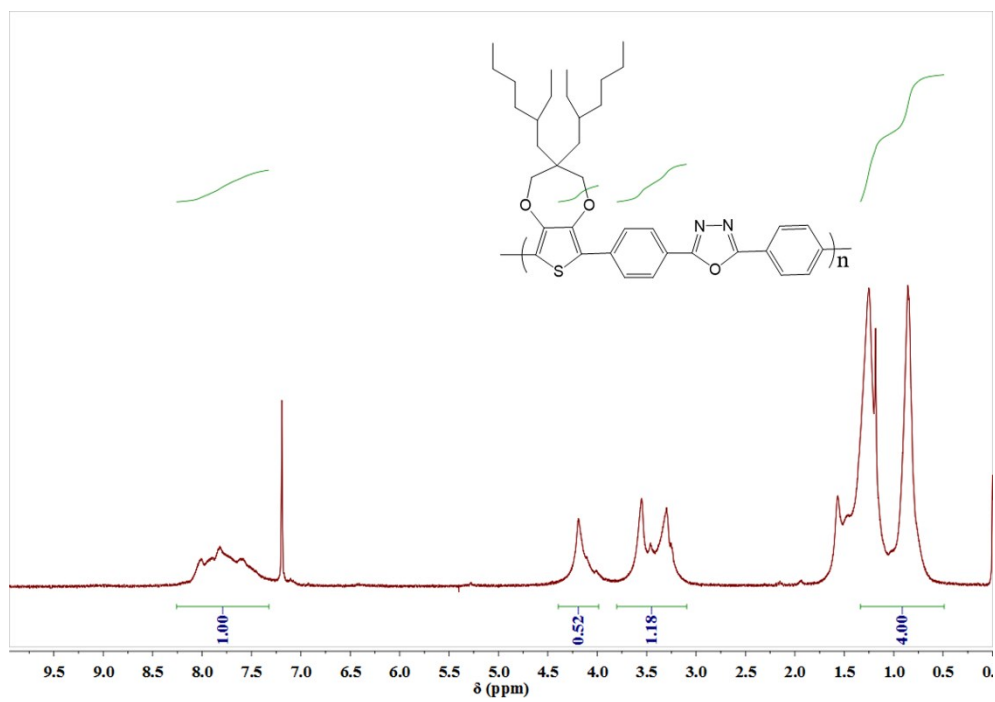

Figure S10.  $^1\text{H}$  spectrum of P4.

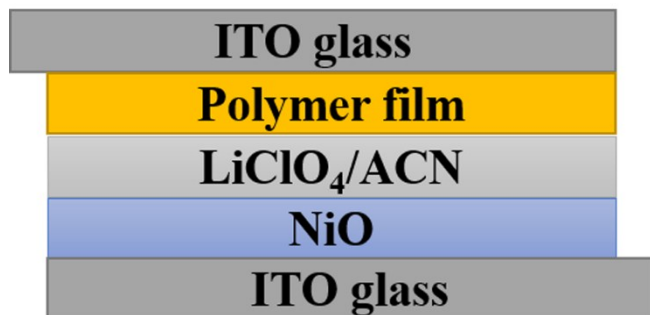

Figure S11. The structural schematic diagram of device.
